# Supplementary material for: Lipopolysaccharide-Induced Differential Expression of miRNAs in Male and Female Rhipicephalus haemaphysaloides Ticks
Source: PubMed Central journal article supplement (PMC4592253; doi:10.1371/journal.pone.0139241), 2015-10-02
Supplement: pone.0139241.s011.pdf [file pone.0139241.s011.pdf]

mireap

malePBS-m0001 DS633978:113214:113295:+ 82(nt) -31.10(kcal/mol)

GCCTTCCGTTTTTGGCACTAGCACATTTTTGTGTTTCGATGCTACGACAAAAATTGTGGTAGTGTCAAGCAATAGGAAGAG

malePBS-m0001 18

..(((((((.( ((((((((((.( ((((((((((((((.( ..... ))))))))))))))))))))))))))))))))))))..

\*\*\*\*\*AAAAATTGTGGTAGTGTCAAGCA\*\*\*\*\*

malePBS-m0001-3p 18

```

-----CAAAAATTGTGGTAGTGTCAA-----
t1124477 1
-----CAAAAATTGTGGTAGTGTCAAGC-----
t1386551 1
-----CAAAAATTGTGGTAGTGTCAAGCA-----
t0277923 2
-----AAAAATTGTGGTAGTGTCAAG-----
t0330849 2
-----AAAAATTGTGGTAGTGTCAAGC-----
t0286540 2
-----AAAAATTGTGGTAGTGTCAAGCA-----
t0074040 10

```

//

mireap

malePBS-m0002 DS682300:151460:151546:- 87(nt) -37.30(kcal/mol)

TTGCCGACCTATGTTGATCGGGTGTCCGCGCTATGCTGGGCGTCGATATGGTGACCCAGCGACCCCGGGGCGACCAGGTCGCCTA

malePBS-m0002 12

..(. ((((((.( ((((((((((.( ((((((((((((((.( ..... ((((((. ((((. ..... ))))))))))))))))))))))))))))))))))))..

\*\*\*\*\*ATGTTGATCGGGTGTCCGCGC\*\*\*\*\*

malePBS-m0002-5p 10

```

-----TATGTTGATCGGGTGTCC-----
t1734433 1
-----ATGTTGATCGGGTGTCCGCGC-----
t0289222 2
-----TGTTGATCGGGTGTCCGC-----
t1896961 1
-----TGTTGATCGGGTGTCCGCGC-----
t2038372 1
-----TGTTGATCGGGTGTCCGCGCT-----
t1965664 1
-----TGTTGATCGGGTGTCCGCGCTA-----
t0768483 1
-----TGTTGATCGGGTGTCCGCGCTAT-----
t1746811 1
-----GTTGATCGGGTGTCCGCGC-----
t0777568 1
-----GTTGATCGGGTGTCCGCGCT-----
t1263754 1

```



malePBS-m0005-3p 8  
----TGCCCTCTTCAGCCGTCGGTTCG-----  
t2031559 1  
-----TCCATTCAGTGTAGAGCCTTCGG-----  
t0405969 2  
-----TCCATTCAGTGTAGAGCCTTCGGA-----  
t0161680 4  
-----TCCATTCAGTGTAGAGCCTTCGGAA-----  
t1915371 1  
-----TCCATTCAGTGTAGAGCCTTCGGAAT-----  
t1803948 1

//

mireap  
malePBS-m0006 DS845963:700:788:+ 89(nt) -20.30(kcal/mol)  
TTGAGTAATGGCAGGTGAGGCTGATGTAACCTTGGTTAGACCTCGATGTTTCATATGTCACCTTGTAACAGTCATGTACACGTTACTAAA  
malePBS-m0006 10  
... ((((((((((((((((((... (((... (((... ((...))...))...))...))...))...))...))...))...))...  
\*\*\*\*\*GCAGGTGAGGCTGATGTAACCT\*\*\*\*\*

malePBS-m0006-5p 10  
-----TGGCAGGTGAGGCTGATGTAACCT-----  
t2013174 1  
-----GCAGGTGAGGCTGATGTAACCT-----  
t0096061 7  
-----GCAGGTGAGGCTGATGTAACCT-----

//

mireap  
malePBS-m0007 DS874548:52973:53057:+ 85(nt) -30.10(kcal/mol)  
TACCTCACCTGAGCTGGAAGAGTTAGATCTGGCACCACCGACAGCGCTCAAGTGTCAGGATCCCCTTCCAACCTCGAGTGGGACG  
malePBS-m0007 6  
... ((((((... ((((((((((((((((((... (((... (((... ((...))...))...))...))...))...))...))...))...))...  
\*\*\*\*\*GAGCTGGAAGAGTTAGATCT\*\*\*\*\*

malePBS-m0007-5p 6  
-----GAGCTGGAAGAGTTAGATCT-----  
t0108978 6

//

mireap  
malePBS-m0008 DS941638:154652:154714:+ 63(nt) -26.00(kcal/mol)  
TGCTTTACTGTCCTGTTCTCGGCACGACGCCTCCCGTGCCGGTGCCGAAACGGGGTGAAGAC malePBS-m0008 7  
.. ((((((... ((((((((((((((((((... (((... (((... ((...))...))...))...))...))...))...))...))...))...  
\*\*\*\*\*TCCTGTTCTCGGCACGACGC\*\*\*\*\* malePBS-m0008-5p 7  
-----TCCTGTTCTCGGCACGACGC----- t0367738 2  
-----TCCTGTTCTCGGCACGACGC----- t0209905 3  
-----TCCTGTTCTCGGCACGACGCCT----- t0755238 1  
-----CCTGTTCTCGGCACGACG----- t1907684 1

//  
mireap  
malePBS-m0009 DS945001:228263:228349:- 87(nt) -39.40(kcal/mol)  
AGTCACTAGTTAATTGTA TCTCATCAGGTGCTCTGGAGTTCGGTTCGCACAACCAGGCATCTTTTGGAGTGCAAATGATAAGTGGCA  
malePBS-m0009 11  
.(((((((.((((.((((((((((((.((((((((.((((.(.(.(...)).)).)).)))))))).)).)))))))).)))).)))).).  
\*\*\*\*\*AGGCATCTTTTGGAGTGCAAATG\*\*\*\*\*  
malePBS-m0009-3p 11

-----CAGGCATCTTTTGGAGTG-----  
t0727296 1  
-----CAGGCATCTTTTGGAGTGCAAATG-----  
t0223350 3  
-----AGGCATCTTTTGGAGTGCAAAA-----  
t1120048 1  
-----AGGCATCTTTTGGAGTGCAAATG-----  
t0119818 6

//  
mireap  
malePBS-m0010 DS966815:32756:32835:- 80(nt) -36.26(kcal/mol)  
CCGAGTGCTGACTCGAGCTGCCCCGTGCAAAACTGGAACCACTGCGTTGTTTTGTTTCGGCTCGAGTTAGAAAACCGGT malePBS-  
m0010 21  
(((.(.(.(((((((((((((((.(.(((((((.(.....)))))))).)).)))))))).)))).)))).).  
\*\*\*\*\*ACTCGAGCTGCCCCGTGCAAAAC\*\*\*\*\* malePBS-  
m0010-5p 21

-----ACTCGAGCTGCCCCGTGCAA----- t0401585  
2  
-----ACTCGAGCTGCCCCGTGCAAAA----- t0217735  
3  
-----ACTCGAGCTGCCCCGTGCAAAA----- t0172878  
4  
-----ACTCGAGCTGCCCCGTGCAAAAC----- t0084495  
8  
-----ACTCGAGCTGCCCCGTGCAAAACT----- t0159198

4  
//
