# Supplementary material for: Lipopolysaccharide-Induced Differential Expression of miRNAs in Male and Female Rhipicephalus haemaphysaloides Ticks
Source: PubMed Central journal article supplement (PMC4592253; doi:10.1371/journal.pone.0139241), 2015-10-02
Supplement: pone.0139241.s012.pdf [file pone.0139241.s012.pdf]

```

t0702667 1
-----TGTCAGACGTCGGGTCGTCGT-----
t0405506 2
-----TGTCAGACGTCGGGTCGTCGT-----
t0287005 3
//
mireap
maleLPS-m0010 DS845963:700:788:+ 89(nt) -20.30(kcal/mol)
TTGAGTAATGGCAGGTGAGGCTGATGTAACCTTGGTTAGACCTCGATGTCATATGTCACCTGTAAACAGTCATGTACACGTTACTAAA
maleLPS-m0010 7
... (((((((((((((((((... (((... (((... ((...))...)))))...)))))...)))))...
*****GCAGGTGAGGCTGATGTAACCT*****
maleLPS-m0010-5p 7
-----GCAGGTGAGGCTGATGTAACCT-----
t0145562 6
-----GCAGGTGAGGCTGATGTAACCT-----
t0835497 1
//
mireap
maleLPS-m0011 DS878697:152111:152195:- 85(nt) -36.80(kcal/mol)
TTGCCAGTCGGGCGCAGTACCTCCAGGGACAGATCTGCATAGCCTGCTGTTCCAGTATCCTGTCGGCTGCGCCAGACTCGCGC
maleLPS-m0011 8
.. ((... ((((((((((((((... ((... (((((((((...))...)))))...)))))...)))))...))..
*****GTATCCTGTCGGCTGCGCCA*****
maleLPS-m0011-3p 8
-----GTATCCTGTCGGCTGCGCCA-----
t0147613 6
-----TATCCTGTCGGCTGCGCCA-----
t0711017 1
-----ATCCTGTCGGCTGCGCCA-----
t0676520 1
//
mireap
maleLPS-m0012 DS904559:10:88:- 79(nt) -22.30(kcal/mol)
GTAATACTTTTCACGAATAAGGGCCAGCGTGTGACTGTATAACAAGGTGCCAGACGTCGGGTCGTCGTGGCAGGATTGA maleLPS-
m0012 6
. (((... ((((((((((((((... ((... (((((((((...))...)))))...)))))...)))))...))..
*****TGTCAGACGTCGGGTCGTCGT***** maleLPS-
m0012-3p 6
-----GTGTCAGACGTCGGGTCG----- t0702667 1
-----TGTCAGACGTCGGGTCGTCGT----- t0405506 2
-----TGTCAGACGTCGGGTCGTCGT----- t0287005 3
//
mireap
maleLPS-m0013 DS908416:537143:537221:- 79(nt) -21.30(kcal/mol)

```
