# Supplementary material for: Lipopolysaccharide-Induced Differential Expression of miRNAs in Male and Female Rhipicephalus haemaphysaloides Ticks
Source: PubMed Central journal article supplement (PMC4592253; doi:10.1371/journal.pone.0139241), 2015-10-02
Supplement: pone.0139241.s013.pdf [file pone.0139241.s013.pdf]

9

```

-----TATGTTGATCGGGTGTCC----- t1146177 1
-----TATGTTGATCGGGTGTCCGCGCT----- t2079422 1
-----ATGTTGATCGGGTGTCCGC----- t0836426 1
-----TGTTGATCGGGTGTCCGCGC----- t2100160 1
-----TGTTGATCGGGTGTCCGCGCTA----- t0257308 3
-----TGTTGATCGGGTGTCCGCGCTAT----- t1152430 1
-----TTGATCGGGTGTCCGCGCTA----- t0607937 1
-----GCTGGGCGTCGATATGGTG----- t1050284 1

```

//

mireap

```

PBS-m0005 DS696092:157396:157474:+ 79(nt) -45.64(kcal/mol)
TGGCGGACTCTAAGTTAATCTCCAAGCCCAATGGTAATTCTCGTCAATTGGGCTGAAGATTAGCTTAGACCCCGCCAA PBS-m0005 12
((((((.( (((((((((((((( ( ((((((((((((((. ....)))))))))))).)))))))))))).)))))))).
*****TAAGTTAATCTCCAAGCCCAAT***** PBS-m0005-5p 12
-----CTAAGTTAATCTCCAAGCCCAAT----- t0863468 1
-----TAAGTTAATCTCCAAGCCCA----- t0334496 2
-----TAAGTTAATCTCCAAGCCCAA----- t0363149 2
-----TAAGTTAATCTCCAAGCCCAAT----- t0121719 6
-----TAAGTTAATCTCCAAGCCCAATG----- t1700189 1

```

//

mireap

```

PBS-m0006 DS709336:35602:35671:+ 70(nt) -19.10(kcal/mol)
ATGGAGACAGCACTCTAAAAGCGCCGAGAATGCACGGCCCGTGGTCTAGGGGTATGATTCTCGCT PBS-m0006 6
... ((((((.( (((((((((((((( ( ((((((((((((((. ....)))))))))))).)))))))))))).)))))))).
*****GGCCCGTTGGTCTAGGGGTAT***** PBS-m0006-3p 6
-----GGCCCGTTGGTCTAGGGGTAT----- t0117485 6

```

//

mireap

```

PBS-m0007 DS728967:139938:140028:- 91(nt) -28.30(kcal/mol)
CGCGAGACACTTGAATACCGCTAGCAACTGTTTATGATGTGAACATCATCATCCATCGGCCGTTGGTCTAGGGGTATGATTCTCGCT PBS-
m0007 6
. ((((((.( (((((((((((((( ( ((((((((((((((. ....)))))))))))).)))))))))))).)))))))).
*****GGCCCGTTGGTCTAGGGGTAT***** PBS-
m0007-3p 6
-----GGCCCGTTGGTCTAGGGGTAT-----
t0117485 6

```

//

mireap

```

PBS-m0008 DS762741:4587:4681:+ 95(nt) -18.60(kcal/mol)
ACGCATCATGATCCTCATGCTGCTCTCTTATGATGATTTGAGTAGGACTATGATGATAATGACGATGACGACGACGACGATGATGATACGG
PBS-m0008 11
. ((((((.( (((((((((((((( ( ((((((((((((((. ....)))))))))))).)))))))))))).)))))))).
*****GACGATGACGACGACGACGATG*****
PBS-m0008-3p 11
-----ATGACGATGACGACGACGATGA-----
t1847869 1
-----GACGATGACGACGACGACGAT-----
t0228208 3

```
