# Supplementary material for: Lipopolysaccharide-Induced Differential Expression of miRNAs in Male and Female Rhipicephalus haemaphysaloides Ticks
Source: PubMed Central journal article supplement (PMC4592253; doi:10.1371/journal.pone.0139241), 2015-10-02
Supplement: pone.0139241.s014.pdf [file pone.0139241.s014.pdf]

mireap

LPS-m0012 DS845963:700:788:+ 89(nt) -20.30(kcal/mol)

TTGAGTAATGGCAGGTGAGGCTGATGTAACCTTGGTTAGACCTCGATGTCATATGTCACCTGTAAACAGTCATGTACACGTTACTAAA

LPS-m0012 11

...((((((((((((((((((...(((...(((...(((...)))))))))))).)))))...(((...)))...))))))...  
\*\*\*\*\*GCAGGTGAGGCTGATGTAACCT\*\*\*\*\*

LPS-m0012-5p 11

-----GCAGGTGAGGCTGATGTAACCT-----

t0277483 3

-----GCAGGTGAGGCTGATGTAACCT-----

t0108362 7

-----GCAGGTGAGGCTGATGTAACCTT-----

t1010290 1

//

mireap

LPS-m0013 DS886901:16593:16670:- 78(nt) -35.70(kcal/mol)

CCGACTCCCCTGGGAAGGTCTGAGACAGGAGCCCGCACAGGCTCAGGCCCTAGCAGGGTCCCGACCGAGAGGTCCGGT LPS-m0013

162

.....((((((...(((...(((...(((...)))))))))))).)))))...(((...)))...))))))...  
\*\*\*\*\*CTGGGAAGGTCTGAGACAGGAG\*\*\*\*\* LPS-m0013-

5p 161

-----CTCCCCTGGGAAGGTCTGAGAC----- t0856916 1

-----TCCCCTGGGAAGGTCTGAGACA----- t1761326 1

-----TCCCCTGGGAAGGTCTGAGACAG----- t1677080 1

-----CCTGGGAAGGTCTGAGACAGGA----- t0526134 2

-----CCTGGGAAGGTCTGAGACAGGAG----- t0780292 1

-----CTGGGAAGGTCTGAGACAG----- t0519274 2

-----CTGGGAAGGTCTGAGACAGGA----- t0095820 8

-----CTGGGAAGGTCTGAGACAGGAG----- t0009609 97

-----TGGGAAGGTCTGAGACAGGA----- t0251610 3

-----TGGGAAGGTCTGAGACAGGAG----- t0032461 27

-----TGGGAAGGTCTGAGACAGGAGC----- t0052714 16

-----GAAGGTCTGAGACAGGAGC----- t0892656 1

-----GAAGGTCTGAGACAGGAGCC----- t0501122 2

//

mireap

LPS-m0014 DS908416:537143:537221:- 79(nt) -21.30(kcal/mol)

CCGACGATGACGATGACGACGACGATGCGTGTGCGCTGCTCGGCTACGACATCGCTACGGTGTGTGTATCGTGCGC LPS-m0014

25

.((((((((((...(((...(((...(((...)))))))))))).)))))...(((...)))...))))))...  
\*\*\*\*\*CGATGACGACGACGACGATGCG\*\*\*\*\* LPS-m0014-

5p 25

-----GACGATGACGACGACGACGAT----- t0936066 1

-----GACGATGACGACGACGACGATG----- t0341475 2

-----CGATGACGACGACGACGAT----- t1243052 1

```
-----CGATGACGACGACGACGATGC----- t1648466 1
-----CGATGACGACGACGACGATGCC----- t0071952
```

11

```
-----GATGACGACGACGACGATGCC----- t0110049 7
-----ATGACGACGACGACGATGC----- t1346225 1
-----GACGACGACGACGATGCC----- t1239190 1
```

//

mireap

LPS-m0015 DS909479:5723:5809:+ 87(nt) -26.80(kcal/mol)

AGATTCGCTAAGCCTAGCTGAAGCCTAAACAATATTTCACGTGAAATTGTTTTGTTAGGTTAGGTTAGGTTGGGTTAAGCACGCGG

LPS-m0015 6

..... ((. ((((((((. ((((((((((((. (((((...))))). ....)))....))))). ))))))). ))). ....

\*\*\*\*\*TAGGTTAGGTTAGGTTGGGTT\*\*\*\*\*

LPS-m0015-3p 6

-----TTAGGTTAGGTTAGGTTGGGTT-----

t1665599 1

-----TAGGTTAGGTTAGGTTGG-----

t1343107 1

-----TAGGTTAGGTTAGGTTGGG-----

t1526206 1

-----TAGGTTAGGTTAGGTTGGGTT-----

t0252364 3

//

mireap

LPS-m0016 DS911299:1700299:1700382:- 84(nt) -42.70(kcal/mol)

GGAGGGCCTTCCCTCACTCAGTTTGGCTGTGGTGTAAACGGGCGCTCGACCCATCACAACTCCTTGAGTGAGTGAGGCCTCGCCG LPS-

m0016 163

((. ((((((((. ((((((((((((. (((((...))))). ....)))....))))). ))))))). ))). ....

\*\*\*\*\*CCTCACTCAGTTTGGCTGTG\*\*\*\*\* LPS-

m0016-5p 162

-----CCTCACTCAGTTTGGCTG-----

t0049520 17

-----CCTCACTCAGTTTGGCTGT-----

t0037148 23

-----CCTCACTCAGTTTGGCTGTG-----

t0019925 45

-----CCTCACTCAGTTTGGCTGTGG-----

t0028199 31

-----CCTCACTCAGTTTGGCTGTGGT-----

t0020945 43

-----CCTCACTCAGTTTGGCTGTGGTG-----

t0299269 3

-----TCAGTTTGGCTGTGGTGTAAACGGG-----

t0625127 1

//



\*\*\*\*\* LPS-m0019-3p 6

-----TTAGGTTAGGTTAGGTTGGGTT--

----- t1665599 1

-----TAGGTTAGGTTAGGTTGG-----

----- t1343107 1

-----TAGGTTAGGTTAGGTTGGG-----

----- t1526206 1

-----TAGGTTAGGTTAGGTTGGGTT--

----- t0252364 3

//

mireap

LPS-m0020 DS980795:53:140:+ 88(nt) -32.70(kcal/mol)

TTGCACTTTTCGAATCCCATCCTCGTCGCCATTTGTATTTTTGAGGAGGCCGATGTTGGTAGTGAGGTGGTTGTCCGAAAGGTGCTG

LPS-m0020 8

..(((((((((( (. (( (. ((( (. ((( (. ((( (. ((( (. . . . ))))..))..)))..))..))..))..))..))..))..))..

\*\*\*\*\*CGAATCCCATCCTCGTCGCCA\*\*\*\*\*

LPS-m0020-5p 8

-----TTCGAATCCCATCCTCGTCGCCA-----

t0377500 2

-----TCGAATCCCATCCTCGTCGCCA-----

t2043418 1

-----CGAATCCCATCCTCGTCGCCA-----

t0157958 5

//
